# Supplementary material for: Golgi-localized Ring Finger Protein 121 is necessary for MYCN-driven neuroblastoma tumorigenesis
Source: PubMed Central journal article supplement — Commun Biol. 2024 Oct 14;7:1322. doi: 10.1038/s42003-024-06899-8 (PMC11473750; doi:10.1038/s42003-024-06899-8), 2024-10-14
Supplement: 42003_2024_6899_MOESM2_ESM.pdf [file 42003_2024_6899_MOESM2_ESM.pdf]

## Description of Additional Supplementary Files

**File name:** Supplementary Data 1

**Description:** the source data behind Figure 1b, c, d, in the paper

**File name:** Supplementary Data 2

**Description:** the source data behind Figure 3h.

**File name:** Supplementary Data 3

**Description:** the source data behind Figure 5c

**File name:** Supplementary Data 4

**Description:** the source data behind Figure 5d

**File name:** Supplementary Data 5

**Description:** the source data behind Figure 5f

**File name:** Supplementary Data 6

**Description:** the source data behind Figure 6
